# Supplementary material for: Improvement of Rice Agronomic Traits by Editing Type-B Response Regulators
Source: MDPI journal article supplement (doi:10.3390/ijms232214165), 2022-11-16
Supplement: s1 [file s1]

## Primers used in this study

| Primer  | Sequence (5' To 3')      |                  |
|---------|--------------------------|------------------|
| 21U3F   | ggcACGGCGTCTCCTCCCAAGCCG | Vector construct |
| 21U3R   | aaacCGGCTTGGGAGGAGACGCCG | Vector construct |
| 21U6aF  | gccgCCAGCACCTTCATCCCCACG | Vector construct |
| 21U6aR  | aaacCGTGGGGATGAAGGTGCTGG | Vector construct |
| 22U3F   | ggcAGAAGTGCTGAACTAGAAGG  | Vector construct |
| 22U3R   | aaacCCTTCTAGTTCAGCACTTC  | Vector construct |
| 22U6aF  | gccGCTCCAATATGCAAGAAGGA  | Vector construct |
| 22U6aR  | aaacTCCTTCTTGCATATTGGAG  | Vector construct |
| 23U3F   | ggcaCTATCGCGCTGAAAATGCTG | Vector construct |
| 23U3R   | aaacCAGCATTTTCAGCGCGATA  | Vector construct |
| 23U6aF  | gccGTATTGAAGGGGATAACCCA  | Vector construct |
| 23U6aR  | aaacTGGGTTATCCCCTTCAATA  | Vector construct |
| 24U3F   | ggcATCAACACAGAAGAAGCCAA  | Vector construct |
| 24U3R   | aaacTTGGCTTCTTCTGTGTGA   | Vector construct |
| 24U6aF  | gccGAATGTAGAGAACATCACCA  | Vector construct |
| 24U6aR  | aaacTGGTGATGTTCTCTACATT  | Vector construct |
| 25bU3F  | ggcaGCTTGAGGAGGCAATGGCTG | Vector construct |
| 25bU3R  | aaacCAGCCATTGCCTCCTCAAGC | Vector construct |
| 25bU6aF | gccGCATTTGATGAGTTCTGCAG  | Vector construct |
| 25bU6aR | aaacCTGCAGAACTCATCAATG   | Vector construct |
| 26U3F   | ggcACATCACTGTGGAAACAGAA  | Vector construct |
| 26U3R   | aaacTTCTGTTTCCACAGTGATG  | Vector construct |
| 26U6aF  | gccGCAGATCAGGAGTCAAGCGA  | Vector construct |
| 26U6aR  | aaacTCGCTTGACTCCTGATCTG  | Vector construct |
| 27U3F   | ggcaGCAGCGGTATGGAGCAGCCG | Vector construct |
| 27U3R   | aaacCGGCTGCTCCATACCGCTGC | Vector construct |
| 27U6aF  | gccGCAGCCAAGCGATCACCTGG  | Vector construct |
| 27U6aR  | aaacCCAGGTGATCGCTTGGCTG  | Vector construct |
| 28U3F   | ggcaGTAGTCTGCATGCCAACCAA | Vector construct |
| 28U3R   | aaacTTGGTTGGCATGCAGACTAC | Vector construct |
| 28U6aF  | gccgTTGAGCATGTAGAATCAGCA | Vector construct |
| 28U6aR  | aaacTGCTGATTCTACATGCTCAA | Vector construct |
| 29U3F   | ggcaGGTGCTGGCAGATGTCCACA | Vector construct |
| 29U3R   | aaacTGTGGACATCTGCCAGCACC | Vector construct |
| 29U6aF  | gccgTGTAGCTTGTAGAATCAGCA | Vector construct |
| 29U6aR  | aaacTGCTGATTCTACAAGCTACA | Vector construct |
| 30U3F   | ggcAGATCACAAGAACAATAACA  | Vector construct |
| 30U3R   | aaacTGTTATTGTTCTTGTGATC  | Vector construct |
| 30U6aF  | gccgAGGTCAGCCTGGACTTTCCG | Vector construct |
| 30U6aR  | aaacCGGAAAGTCCAGGCTGACCT | Vector construct |
| 31U3F   | ggcATGTCGTCCATGGAGTCACG  | Vector construct |

|           |                                          |                        |
|-----------|------------------------------------------|------------------------|
| 31U3R     | aaacCGTGACTCCATGGACGACA                  | Vector construct       |
| 31U6aF    | gccgCCTCTGCGATGTCAAAAAGG                 | Vector construct       |
| 31U6aR    | aaacCCTTTTGTGACATCGCAGAGG                | Vector construct       |
| 32U3F     | ggcaGTTTCGGTCTCGTTGACACGG                | Vector construct       |
| 32U3R     | aaacCCGTGTCAACGAGACCGAAC                 | Vector construct       |
| 32U6aF    | gccGCTATCGTGGCCAGTCGAG                   | Vector construct       |
| 32U6aR    | aaacCTCGACTGGGCCACGATAG                  | Vector construct       |
| 33U3F     | ggcaCCACCTTGTGGACATCGCAG                 | Vector construct       |
| 33U3R     | aaacCTGCGATGTCCACAAGGTGG                 | Vector construct       |
| 33U6aF    | gccGTTTATAGTCGATCATTCGA                  | Vector construct       |
| 33U6aR    | aaacTCGAATGATCGACTATAAA                  | Vector construct       |
| U-F       | CTCCGTTTTACCTGTGGAATCG                   | Vector construct       |
| gRNA-R    | CGGAGGAAAATTCCATCCAC                     | Vector construct       |
| Uctcg-B1' | TTCAGAggtctcTctcgACTAGTGGAATCGGCAGCAAAGG | Vector construct       |
| gRctga-B2 | AGCGTGggtctcGtcagGGTCCATCCACTCCAAGCTC    | Vector construct       |
| Uctga-B2' | TTCAGAggtctcTctgaCACTGGAATCGGCAGCAAAGG   | Vector construct       |
| gRcgt-BL  | AGCGTGggtctcGaccgACGCGTCCATCCACTCCAAGCTC | Vector construct       |
| Hpt757F   | GGGCGTCGGTTTCCACTATC                     | Transgenic analysis    |
| Hpt757R   | GGGAGTTTAGCGAGAGCCTG                     | Transgenic analysis    |
| Cas9F     | CACGAGGTCCGACAAGAACA                     | Transgenic analysis    |
| Cas9R     | ACCTTGCGAACAGTAGCGAA                     | Transgenic analysis    |
| 21TF      | GGCAGCAGTAGCAGGCATCA                     | Target site sequencing |
| 21TR      | AGCAAATCAACCCACGGAGC                     | Target site sequencing |
| 22TF      | GGATAAATTGAACGAGGTTCC                    | Target site sequencing |
| 22TR      | TCACTTGGCAGTTGAGTGCTT                    | Target site sequencing |
| 23TF      | TCAAGGTGCTCGAGACCCCTG                    | Target site sequencing |
| 23TR      | TCTGAATCCGCATTTGGTGG                     | Target site sequencing |
| 24TF      | AAGGCACAGGGAATGAACAATG                   | Target site sequencing |
| 24TR      | ACCGTTTAAGGTACAGCCGATA                   | Target site sequencing |
| 25TF      | TGCGGATGATGAAAGTGAC                      | Target site sequencing |
| 25TR      | GCAGACGAGTTGCCAGAATG                     | Target site sequencing |
| 26TF      | ACATGCCTGATATGGATGGTT                    | Target site sequencing |
| 26TR      | TTGCTCTTTCGGAATGAGATT                    | Target site sequencing |
| 27TF      | GGTGATGAGGACGGTGATGAA                    | Target site sequencing |
| 27TR      | TGCTCGTATGCCCTGACAAAC                    | Target site sequencing |
| 28TF      | GAAATTATCATACGCAATGGTC                   | Target site sequencing |
| 28TR      | CAACTTTAAGGAACTCAAAGCC                   | Target site sequencing |
| 29TF      | CTCCCTGCTGGTAGGCTTAG                     | Target site sequencing |
| 29TR      | TGACGCACCTCTTCATTGTG                     | Target site sequencing |
| 30TF      | TCACAATGGGCTGCTCTAGT                     | Target site sequencing |
| 30TR      | TTCTTTGGAAGTGCCTCTGC                     | Target site sequencing |
| 31TF      | TTTTCTAGTGGTGGCAACGC                     | Target site sequencing |
| 31TR      | TCAGAAGAACCTGCACCGTC                     | Target site sequencing |
| 32TF      | TAGACGTCCAGACTGTCTCTGCGA                 | Target site sequencing |

|              |                            |                        |
|--------------|----------------------------|------------------------|
| 32TR         | GGTAACGGCTAATTTCATACGAG    | Target site sequencing |
| 33TF         | CACATCAACCTACTCCCGC        | Target site sequencing |
| 33TR         | AGCACACATCCCCTCTCTC        | Target site sequencing |
| qHd3a-F      | CTTCAACACCAAGGACTTCGC      | qRT-PCR                |
| qHd3a-R      | TAGTGAGCATGCAGCAGATCG      | qRT-PCR                |
| qRFT1-F      | TGACCTAGATTCAAAGTCTAATCCTT | qRT-PCR                |
| qRFT1-R      | TGCCGGCCATGTCAAATTAATAAC   | qRT-PCR                |
| qMADS14F     | TGGGACCAGACACAACCTCA       | qRT-PCR                |
| qMADS14R     | CCTGCTGCTACATCCTCTAT       | qRT-PCR                |
| qMADS15F     | CGTCGTCGGCCAAACAG          | qRT-PCR                |
| qMADS15R     | TGACTTCAATTCATTCAAGGTTGCT  | qRT-PCR                |
| qUbiquitin-F | AACCAGCTGAGGCCCAAGA        | qRT-PCR                |
| qUbiquitin-R | ACGATTGATTTAACCAGTCCATGA   | qRT-PCR                |
