# Supplementary material for: Improvement of Rice Agronomic Traits by Editing Type-B Response Regulators
Source: MDPI journal article supplement (doi:10.3390/ijms232214165), 2022-11-16
Supplement: s1 [file s1]

>OsRR1 A-type response regulator, Cytokinin signaling

MEGGRGVTRVLLVDDSPVDRRVVQLLLSSSACAGSFHVIIVDSAKKAMEFLGLKEEGKE  
QAIDMVLTDYCMPMTGYELLKAICALSPLKPIPVIMSENENPQRISRCMNAGAEDFIVK  
PLQSKDVQRLRNCSPANTQCCDAGSDGKPLLLPSDHVVVDATAASPPPPSRRAHFAG  
VAMVLHSSSVELSHYFPFLFKFILLVYAILCLGELLHRWSNGCFLNLWCA\*

>OsRR2 A-type response regulator, Cytokinin signaling

MGAEAVRVLVDDSPVDRRVVELLLRAHCGGGGGAAAGEAAPFHVTAVDSGKKAMELL  
GRRRGDRDHLTPSSPAAAAAANDQAIDIVLTDYCMPMTGYDLLKAICALGSPNPIPVV  
MSENENPQRISRCMTAGAEDFILKPLKMNDVQRLRKCSGATRPKSAVAGDDDRCCNTAKK  
AAAAAATPEQQQQQQRSSHLAGLAMVMNASSFEVSHYFQLIFKLILLAYAVLCLSQLLH  
RWSNGSSLLSLWCA\*

>OsRR3 A-type response regulator, Cytokinin signaling

MSTKTVPEPEPHVLAVDDSIIVDRVISRLLRSSKYRVTTVDSGKRALEVLSDLRNVHMIIT  
DYCMPMTGFDLLKRVKESAELEIPVVMSENENPSTRIRRCLEEGAEDFLIKPVRPSDVS  
RLCNRVIMK\*

>OsRR4 A-type response regulator, Cytokinin signaling

MTVVDAESRFHVLAVDDSLIDRKLIELLLKNSSYQVTTVDSGSKALELLGLRDEGDDSSS  
SPSSSPDHQEIDVNLITDYCMPGMTGYDLLKRVKGSSSLKDIPVIMSENENPARINRCL  
EDGAEEFFLKPVKLADMKKLKSHLLKRKQQLPMAAAPDKPPHKPDEAAASAAIAEA  
ATAQTDGIISDCSCSGSSKRKAAAMEQEVISSPDQRTKPLSSTSSGLAVET\*

>OsRR5 A-type response regulator, Cytokinin signaling

MATCRSRGVERGGAPHVLAVDDSSVDRAVISGILRSSQFRVTAVDSGKRALELLGSEPNVS  
MIITDYWMPMTGYELLKKVKESRLKEIPVIMSENENSTRINRCLEEGAEDFLLKPVPQ  
SDVSRLCSRVL\*

>OsRR6 A-type response regulator, Cytokinin signaling

MAAAAQAPAAAKVVVATSPRAGGGGGGGDRKVVPVVVAAAAGDEAQSEMHLAVDD  
SSVDRAVIAKILRSSKYRVTTVESATRALELLCLGLVPNVNMIITDYWMPGMTGYELLKRV  
KESSQLKEIPVIMSENENPNRISRCLEEGAEDFLLKPVRPSDVSRLCSRIR\*

>OsRR7 A-type response regulator, Cytokinin signaling

MRVPAAVTGGCGCGVDGGGGCCRGGGKGLADWEEGKDDMKSVVVKGWTRMAQVVPL  
HDNASAEDDDDEEDDEDDDDDDDEDEEEAAPPYVMAVDDSSVDRAVITALLRRSK  
YRDSGKRALEILGSEPNVSMIITDYWMPMTGYDLLKKIKESSELKQIPVIMSENENPTRI  
SRCLEEGAEDFLLKPVRPADISRITSRMLQ\*

>OsRR8 A-type response regulator, Cytokinin signaling

MSSPHVLVDDTHVDRHVSMALMRHNVRTAVESVMQALMFLDSEHDVDMIVSDYC  
MPDMTGYNLLMEVKKSPKLAHLPVVIASSDNIPERIRKCLDGGAKDYILKPKIVDVPRI  
MKYI\*

>OsRR9 A-type response regulator, Cytokinin signaling

MAVAIEAPFHVLAVDDSLPDRKLIERLLKTSSFQGLAFVCVTTVDSGSKALEFLGLHDHE  
DSPISTQSDQGEVAVNLIITDYCMPGMTGYDLLKKIKESSYLRDIPVIMSSDNIPSRINRCL  
EEGADEFFLKPVRLSDMSKLKPHILKSRCKEHYQQEQNLQSNSESNNSSNPTSENSSSSTSS  
NSHKRKAVDEEILPHTIRPRHS\*

>OsRR10 A-type response regulator, Cytokinin signaling

MAVAIEAPFHVLAVDDSLPDRKLIERLLKTSSFQVTTVDSGSKALEFLGLHDHEDSPISTQS

DQQEVGVNLIITDYCMPGMTGYDLLKKIKESSYLRDIPVVIMSSDNIPSRINRCLEEGADEF  
FLKPVRLSDMSKLPKPHILKSRCKEHYQQEQHLQSNSESNNSSNPTSSENSSSSTSTNSHKRK  
AVDEEILPHTIRPRHS\*

>OsRR11 A-type response regulator, Cytokinin signaling

MSSIGAGAGGAVVGAAVA AVAVGGGAPPHVLAVDDSSVDRAVIAGILRSSRFRVTAVDSGK  
RALELLGSEPNVSMIITDYWMPMTGYELLKKVKESSKLLKIPVVIMSSENVPTRISRCLE  
EGAEDFLVKPVRPSDVSRLFSRVLP\*

>OsRR12 A-type response regulator, Cytokinin signaling

MSSPHVLVDDTLVDRHVSMALMRHNVRVTAVESVMQALMFLDSEHDVNMIVSDYC  
MPDMTGYDLLMEVKKSPKLAHLPVVIASSDNIPERIRKCLDGGAKDYILKPVKIVDLPRIL  
NYI\*

>OsRR13 A-type response regulator, Cytokinin signaling

MSSPHVLVDDTHVDRHVISMALMRHNVRVTAVESVMQALVFLDSEHDVNMIVSDYCM  
PEMTGYDLLMEVKKSPRLVHLPVIIASSDNIPERIRKCFDGGAKDYILKPVKIADVPRILNY  
I\*

>OsRR21 B-type response regulator, Cytokinin signaling

MAPVEDGGGVFEFPVGMKVLVDDDDPTCLAVLKRMLLECRYDATTCSQATRALTMLREN  
RRGFDVIISDVHMPDMDGFRLLLELVGLEMDLPVIMMSADSRTDIVMKGIKHGACDYLIK  
VRMEELKNIWQHVRKKFNENKEHEHSGSLDDTDRTPTNNDNEYASSANDGAEGSWKS  
QKKKRDKDDDDGELESGDPSSTSKKPRVVWSVELHQQFVNAVNHGLIDKAVPKKILELM  
NVPGLTRENVAHLQKFRLLYKRIAQHAGIANPFCPPASSGKVGSLGGLDFQALAASGQI  
PPQALAAALQDELLGRPTNSLVLPGRDQSSRLAAVKGNKPHGEREIAFGQPIYKCQNNAY  
GAFPQSSPAVGGMPFSFAWPNNKLGMASTGTGGMSNSQNSNIVLHELQQQPDAMLSG  
TLHSLDVKPSGIVMPSQSLNTFSASEGLSPNQNTLMIPAQSSGFLAAMPSPMKHEPV LATS  
QPSSSLLGGIDLNVQASTSQPLISAHGGGNLSGLVNRNPNVVPSQGISTFHTPNNPYLVSPN  
SMGMGSKQPPGV LKTENS DALNHSYGYLGGSNPPMDSG LLSQSKNTQFGLLGQDDITG  
SWSPLPNVDSYGNTVGLSHPGSSSSSFQSSNVALGKLPDQGRGKNHGFVGKGT CIPSRFAV  
DEIESPTNNLSHSIGSSGDIMSPDIFGFSGQM\*

>OsRR22 B-type response regulator, Cytokinin signaling

MLLGALRMEERKGLMGRERDQFPVGMRVLA VDDDPVCLKVLETLLRRCQYHVTSTNQA  
ITALKLLREN RDMFDLVISDVHMPDMDGFKLLELVGLEMDLPVIMLSVNGETKTVMKGIT  
HGACDYLLKPVRIEELRN IWQHVVRRKFGNRERNNLDFSKECNKPQSADTDHGPYQPTC  
GSSDQNGRSSSRKRELHGEDDDEGDDNDYQENDEPSAAKKPRVVWSVELHRKFVA AVN  
QLGIDKAVPKRILELMNVEKLTRENVAHLQKYRLLYKRLGAVASQQASIVAAFGGRDPSF  
LHIGAFEG LQSYQPFAPSAALPSFNPHGLLTRTSAAA AFG LQELAAPSSTIQTSTGNVTVGH  
CLEENQQANLAQGLTAAIGQPQLQQNWIHQEGNGLSDVFSGSSLTNTLSSTLQRPSSSLP  
PQELLECKQAKVSMPPSIRIPPSSSALLERTLGVSTNLGDSSISQQGALPIDGGFSADRLPLH  
SSFDGAVATKLDTS LAASQREIGQQGKFSVSM LVSPSDNLALAKNAKTGASSSGSTIILPLD  
TARHSDYLQFGGASNSLQKMDGQKQDHIQSSNIIWSSMPSTQLPSDTQIHNTQNQR LDSG  
SFNHNIGAHLADQTNASASILPQMKFDTRISEEKM KQKNTYDLGSSKLQGGFNSSGCNFD  
GLLSIIKVEKDDLPFMDNELGCDLFLGACI\*

>OsRR23 B-type response regulator, Cytokinin signaling

MRAAEERKGVVPAARRRDQFPVGMRVLA VDDDPVCLKVLETLLLRCQYHVTTTNQA AI  
ALKMLREN RDMFDLVISDVHMPDMDGFKLLELVGLEMDLPVIMLSVNGETKTVLK GITH

GACDYLLKPVRIEELRNIWQHVIRRKFSTRDRANLDFYEECNKPPNADSDHVGHVTCGS  
PDQSGRPSKKRKEYCSEEEDEGEVNTQDIDDPSAPKKPRVVWSVELHRKFVAAVNQLGID  
KAVPKRILELMNVEKLTRENVASHLQKYRLYLKRLSAVASQQVSIVAALGGRDPFLHMGG  
FEGHQYQAFSTSSAALSSFTPHGLLNSPRNNPAALGTQGVPAKSIQTMSGSHLSHSIND  
ANKYHLSLPGNQKGNLGGGLATSLGQTQMQQKWIHEETDDLSTILSGNGLSNGMSGTLQ  
SVTSSPLLQELAECTQAKIVSQPSIRTSSVSSEHIEGAVGVSSGLLESRVSSQSTIPLSGFSA  
NGLLIHGSFNNTCANKLGGTSSSCAPARSSNDLMVARDTKGGASSFGGAMLLPPDTEQKY  
LNFGGGNGLKQKFDRTADSLFDLKFVWSSVPSSQLASNIGAHHAMSQRWNNSSSSNSSNI  
GARMIGQATSSGSTVIPQMKTDFLVSGDMAMPKNASDLSIPKLQSELSSSSCSFDGLLSIV  
KVEKDDVTFSDDLGCGDFYSLGACI\*

>OsRR24 B-type response regulator, Cytokinin signaling, Rice meiosis and fertility

MTVEERQGRVGGHGVSGGGGGRDQFPVGMRLVAVDDPTCLKILENLLLRCQYHVTTT  
GQAATALKLLRENKDQFDLVISDVHMPDMDGFKLLELVGLEMDLPVIMLSANGETQTVM  
KGITHGACDYLLKPVRLEQLRTIWQHVIRRKNCDAKNRGNDDDAGQKAQGMNNEGESI  
GANRNKRQSRKSRDENGDDGDDSDENSNENGDSSTQKKPRVVWSVELHRKFVAAVNQL  
GIEKAVPKILDLMNVENITRENVASHLQKYRLYLKRLSTDASRQANLAAAFGGRNPAYIN  
MNSFGNYNAYGRYRTVPTAGHTQANNILTRMNSPSAFGVHGLLHSQPIQLGHAQNNLSTS  
LNDLGGLNNGNMIRGAQMSTILTPSGNSFPNISNGAPLATANRSLQPLESSNQHLSRVH  
SSSADPFSTLVGESPOFPDLGRTTNTWQTAVPSNIQDRGHNDNMSQATLHMNGPKIEPVSS  
FTSSNQIPLLGNEMQQQVASLASNVPIAFNQDTSPFNYGSSTNSRDMLNNSHVFSNSSINTS  
LPNLSLDNPAVPRQTLDRGNTGIVSPMQDGRHHQAVSNQLNYNDDLMRTTGLQRGLSGG  
LDDIVVDMFRPDREDDGVPIYIDGDWELV\*

>OsRR25 B-type response regulator, Cytokinin signaling

MAATQATAARKFPEGLRVLAVDDSPVCLMLLEALLRRCKYQPTMTRDAATALRMLRERP  
GDFDLVISDVHMLDMDGFKLLELIGLEMDLPVIMQSANGELETMMKGVTHGACDYLVKP  
VSLKDIQNIWQHVVWRKRKLDIRNHNGGYNDGGELVGATRTRKRYTRKMRNDGDNYGE  
NKENMDSTLKRQRVVWTPELHRDFVIIVHELGVDRVPRKILRMMKVDTYMTRENIASHL  
QKYRLYLKRISTQTGMDPDQFPEKWYMNELDALKNYCENGRYRLTPAIASSSSSNPFAR  
MNSASALATNGFLPTHSVQLKNSQRNMAMGTVGHGGSPGNNPVFQPLQNSSNARKCFPS  
GPSGSSFANISNGLVLDTDDSGSSYAGMFCKSMWETSNGSPSCHSGNSSANKSNNGVSAP  
ANQFQVQSKFGFSALANQFPVQSNCGFSAPANQYQVQSNGGFSVPANQFPVQSNGEFLAP  
TNQFPVQYPEVNNQPLVQMNQSSTNHFSTIGNDYQFPDLANCSKYWQPTAPSMFPDLGH  
NDGTSFRPSQANIANINQLSSFAASSGQEPMFGDELHGQMSPIMSTISLSDFDDQMGSFNIG  
NDTSPAEMMHDNFSLGSDSNISSSTPTDSSFGSTFPDFHLDSPEMPAQMLNGGDEDGILLP  
VLDDTVDQQDLFDQLDENNGNFQSNNSVVKALVFAS\*

>OsRR26 B-type response regulator, Cytokinin signaling

MDATAFPYGLRVLVVDDPTWLKILEKMLRKCSYEVTTCGLARVALDILRERKNKFDIVIS  
DVNMPDMDGFKLLEHIGLEMDLPVIMMSIDGETSRVMKGVQHGACDYLLKPVRMKELR  
NIWQHVVYRKKMHEVKEIEGNDSCDDLQILRNSFEGLDEKSLFMRSDSDTMRKRKDVK  
DHADQESSDGNTVKKARVVWSVDLHQKFVNANVQIGFDKVGPKILDLMNVPGLTREN  
VASHLQKYRLYLSRLQKQNEERILGAARQDFSHKGTSENLNLRSSFQEQPSNIANGYPHAS  
QNIQTQANMLDSQLEDTKSTVPLPVPDKKRTLASDAADSQNVTSASSLGGVLSFKSMPVN  
QDRKPSETMILECQAWTGGPSKQFMQYPKHNERCDLLGDYSCLPKPDLEHPVGPSNLY  
APPPLISMSCGMEGDARDFSDVKPAIMDCIKSLSPALTCTVDSVSVQLSDSVVTSIDGDLKS

SGVDGLPSIKDCCLDQTN SQGSLRPSQEPSIIGSTELASLPEDLPSYPLHGV SLENIGLSSIDL  
LNYS DAMILSGLQSNWYDDLEFSSEMMDYPSIDECLFASS\*

>OsRR27

MAENNGAVPPGCKLPAGGFFGRLHVLVVD DDAAYLEELKLM LLLAGYAVTGKTTAE EAL  
KEVDQNPEDYFHIVMTDVHMSGMDGFDLLHRINGRVPVIMFSEGEDVVMVMRTVMNGA  
CDYMKPMTSEAIKFIWKHVLRLWRLSALPANASSSLQPSDHLAAALAAVAPPPPAVQLPA  
APAQAGNRDGEAHEEAELSTQPPALVPSGVQEAAA AVWSSRGDGEAPPPAVAAAAKAPS  
KKRGASEVSDRGSNLEATTGRKKVRTRFTWTTVSHTSFV RAYEQLKDQEGPKKIKQLM  
ELDGIFVTKTQVSSH LQKYRSWLENERKKEEATSSSPCNPLSYTNCLDRGYSTWKQSSVIT  
EGQQSSSFSGRPIHSMATSNGLT TTD TQAGNYVGVGAKEIENFISSHQRSLGTAIGQESTI  
EQASLHSEITSVSRDAHENGNSQARGSAMNGTSGTRGV LVTNENLLHVVSASLPSNMG  
QPTQPSQSFC TNELAAANYSIISDQNP GTSHPTSSSAINNQNSKTQEMSVSQTVELGCGNDV  
MLDWPELVGLEDQLDNDVLMNSFFDGDLLQQGVVTAIDGTQEMLAFDSTGDLGSPPRG  
LNNEIASHENTNGKNGASSGP\*

>OsRR28

MAQNEGIPNGTLSAMVIDEDKCHADSTCSMICTQLNFCVTVFTSPIKALDFLQNQAEGVH  
LVLADVQMEEMNGFEFLKVARELHKSIQVIMMSTETTIT YTMKRCVQLGAQILVKKPLDVV  
TIQNLWQHLDIKVLKMEKIKDMLQGVGDKSTCANEMNSFPENQKDGT KRKYLMWTPH  
LQKKFLHALEILGEGQISLMIMDVDNIDRKQISTHLQKHRLQLKKKLSKASFTKGSNEDTS  
NPSAKNHLTCRTMTLQPHPYTNQPAETTMQIHSE DVEHDDVYDAMRRALQDGTAFDESK  
YSSDPFSNEDEDVVG DGYADKANAISSGDHYQVAVVLTTPHNVDYTQEIMNKVTTSD  
VQVTRGGKATVSRLVDYSDSDSD\*

>OsRR29 LOC\_Os04g28130.1

MAQKEGLPAGRLSAMVIDEDKCHADSTSYMLSAELNFSVTVFTSPIKALDFLQNHAE GV  
DLVLADVHMEEMNGFDLKVARELHKSIQVIMMSTETTMYTMKRCVKLGAQFLVNKPL  
DAGTIKNLWQYVDLKVLRMEKIKDLLQGIGDESTCANETNSLAENPKNDTKKKYYLMW  
TPHLQKKFLHALQILGKDASPKNIKKIMGVDNIDCRQIAAHLQKHRLRLTKDLKKASFTT  
DTSKDESNSRIGPAESHVCRNASTLQPRSNTQPTETTMQILSEDAEYDDVYAAMRRALQ  
YGIVFDESKHSSDPGDEDEQVVVG DQDGCANEANDIDSSGDHHQVA AVVTKPCNANA  
SQEIINKMTNSDGMQATKGSKAAV FRLVDYSES DSD\*

>OsRR30 B-type response regulator, Floral inducer to promote short-day (SD) flowering pathway

MDHRELWPYGLRVLVIDDDCSYLSVMEDLLLKCSYKVTTYKNVREAVPFILDNPQIVDLV  
ISDAFFPTEDGLLILQEVT SKFGIPTVIMASSGDTNTVMKYVANGAFDFLLKPVRIEELSNI  
WQHIFRKQM QDHKNNNMVGNLEKPGHPPSILAMARATPATRSTATEASLAPLENEVRD  
DMVNYNGEITDIRDLGKSRLTWTTQLHRQFIAAVNHLGEDKAVPKKILGIMKVKHLTREQ  
VASHLQKYRMQLKKS IPTTSKHGATLSSTALDKTQDHP SRSQYFNQDGCKEIMDYSLPRD  
DLSSGSECMLEELNDYSSEGFQDFRWDS DKQEYGPCFWNF\*

>OsRR31 LOC\_Os08g35650.1

MEDQLSFFPGGLRVM PVDGDTKNTRTATKTLSTLHYSLVATHTTASAGLCTLSSDNMTDV  
QTVLCDVKKVVS SSGFDFRRVVETEHHIPVIYLLSTTEPEQM VAGEDTEFLNHL LKATYIV  
RKPLDQATMAQLWRVVAWRRCCL EERIPRDSMDDIAAHAGVVGKDGNDNDVIII EPQV  
HFKVVRSRGSRK RQLTINVDSGSSDGADANPRQKLEHKKDAKGPLGQH VASHLQPQEYC  
TKQQKDLDERLLSLDSLFLKAILSTLNVSLCNPLILTVPA AFTPQDGMTM NKDKAPMIEL  
PFGLPVDDFLVGQTAYGSAGPSIGAPDDND DDAAMYAYTSALNNNA AVGSLMVPPIESTF

TIIDPIVGTKEGSVPVVVVSEDQNNAAIEATAPNNAELFMMPEQVAVDAPVDVEEGIM  
FSLESLLGLDEDMIPMEDAGGEATDDSLNIKEGGMEIGWDLDLDYILMNNTNEFAFLDDM  
AWIE\*

>OsRR32 LOC\_Os08g17760.1

MEDMLSFFSSGLHVMLVDDDTKNTRTATKTL SMLHCPVVSTHTTACAGLRTLSGDNMLD  
VQTVLCDVSKVVSSGFD FRRVNETEHQIPVIYQERVPGDSMDDIAAHAGAGGEDGNDDD  
VVVIEEPQVHF KLVRSRGRSRKRQLTINVDSGSSDSA AFKYAVWLIISIRSTDIDLSDANQRK  
KIEHMNDAKGPVGQHVASHLQLPAQEYCTKQQKDLDERRLISSDSLFLKAIFPTLNVSPSS  
PLILAGGAGPSCIPTTTIAGSRTAAPFQVPVFQQQPSGTTVISFSNTAVQAPIGNAFISFNNA  
SPAATGNTVISFNNAAPAAMQVPAMRQRLSGGVQPDAPQQRLYMGPF SYQGPPPPPTMR  
NHINIVPTAFIPRVGMTVNIGKAPMIELPFGVPVDDFLVGETAYGGAGPSIGAPSNDAAVAY  
AYTGALNNNTAVGSLMAPPIDEPTFTLTDP IVGTKEGGVVHIVITSEDQNALAAVEAGAPN  
NAEPFMMPDQVDLEEDIMFSLESLLGLDEDMIPMEDAGGEAAEGSLNIGEGGMEIGWDL  
DLDDILMNNTNEFAFLDDLAWIE\*

>OsRR33 Signal transduction response regulator, receiver region domain containing protein

MDQARISFFPDGLRVMIIDDDAKAVRRATATLSQLQYAVVATHSTASAGLRALSGDNVVEI  
QAILCDVHKVVSSGFD FRRVVESELRIPIVYLLSKMEEEDMVAGEDAEFLNHL LLLTATYIV  
RKPLNPTVMARLWRVVAWRMYCLEERIQANVAANAGAGGEDDDDDDDDVVIEEPQVHF  
KVVRRTSGGSRKRQLTINVDDGNRSGSGSGGGGGGADANPTRILQHITSNLQEFR TKHQ  
KKDMAIERPLISSDSMFLKAILPTLKISPCNPLTLTGGIGSSSVAAEAFAGGSSSAAPLQIPVF  
QQQSTGNGNTVISFSNNASPMAMRPTDNTMISFN NVSAAPVANAVISFSNISRSAAMQAP  
AARGQHLSGDVQQLD FFPQQKLYFGPF SYQGPPPPSMHNNHINLLPPTSSPVTCSDMKGKVPI  
IELPYGMPVDDFLVSQTTYGGAGPSIGATDA AAAAYPYTDAPSNNVATGCLMVPPMGPAF  
SITEPTVVAQGE GTGTGVDAGTSEKNAIVEAPNNAPLMVLDQVAADAAMDVQEDIMFSL  
ESLLGPDYDLLPMEDVSAPDTAAAGDAAGGSLDGEEGMDIGWDLDLDDILVENVNDFA  
FLDNLAGSE\*

>OsRR41 Signal transduction response regulator, receiver region domain containing protein

MARKMIRVLLVEDEEINRVVARAALKAAGGGDVVDEAENGEVAVQRVRDAAAPYDLVL  
MDKQMPVMDGHEATRIRGMGVTTPIVAVSSDGLPADVDAFITAGADDFTSKPLSKEKLG  
VILAKFRLA\*

>OsRR42 Hypothetical conserved gene

MAFQTQGSNLRALLVEDIKVNRMILSQMLRK FQVETTVVQNGKEAVELFLGGETFDIVLT  
DNLMPIMTGPEAISKIRAMGATDVMIVGVSDANSMEEFKDAGADLCV PKL KLEILEHIL  
QETR SKKNKSSA\*
